# Supplementary material
Source: PubMed Central journal article supplement (PMC4142244)
Supplement: mmc1.pdf [file mmc1.pdf]

## SUPPORTING MATERIAL

### Analysis of the linearized dynamics

In Fourier space (where  $\widehat{a}(\omega)$  denotes the Fourier transform of  $a(t)$ ) the dynamics defined in Eq. (5) of the Main Text takes the form

$$\begin{aligned} i\omega\widehat{x}_i &= -d_i\widehat{x}_i + \widehat{b}_i^o - k_i^+([\mu]\widehat{x}_i + [m_i]\widehat{y}) + k_i^-\widehat{z}_i \\ i\omega\widehat{y} &= -\delta\widehat{y} + \widehat{\beta}_o - \sum_i k_i^+([\mu]\widehat{x}_i + [m_i]\widehat{y}) + \sum_i (k_i^- + \kappa_i)\widehat{z}_i \\ i\omega\widehat{z}_i &= -(\sigma_i + k_i^- + \kappa_i)\widehat{z}_i + k_i^+([\mu]\widehat{x}_i + [m_i]\widehat{y}) , \end{aligned} \quad (1)$$

and leads to the following equations:

$$\begin{aligned} \widehat{x}_i(\omega) &= \frac{\widehat{b}_i^o - k_i^+\Gamma_i(\omega)[m_i]\widehat{y}}{i\omega + d_i + k_i^+[\mu]\Gamma_i(\omega)} \\ \widehat{y}(\omega) &= \frac{\widehat{\beta}_o - [\mu]\sum_i k_i^+\Lambda_i(\omega)\widehat{b}_i^o}{\Delta(\omega)} \\ \widehat{z}_i(\omega) &= \frac{k_i^+([\mu]\widehat{x}_i + [m_i]\widehat{y})}{i\omega + \kappa_i + \sigma_i + k_i^-} , \end{aligned} \quad (2)$$

where

$$\begin{aligned} \Gamma_i(\omega) &= 1 - \frac{k_i^-}{i\omega + \sigma_i + \kappa_i + k_i^-} = \frac{\tau_{2,i}(1 + i\omega\tau_{3,i})}{\tau_{3,i}(1 + i\omega\tau_{2,i})} \\ \Delta(\omega) &= i\omega + \delta + \sum_i k_i^+[m_i] \left(1 + \frac{[\mu]}{\mu_{0,i}Z_i(\omega)}\right)^{-1} \end{aligned} \quad (3)$$

$$\Lambda_i(\omega) = \frac{\sigma_i}{d_i(k_i^- + \kappa_i + \sigma_i)} \frac{1 + i\omega\tau_{4,i}}{(1 + i\omega\tau_{1,i})(1 + i\omega\tau_{2,i})} \left(1 + \frac{[\mu]}{\mu_{0,i}Z_i(\omega)}\right)^{-1} ,$$

and we have used the time scales  $\tau_{k,i}$  ( $k = 1, \dots, 4$ , see Main Text) as well as the function

$$Z_i(\omega) = \frac{(1 + i\omega\tau_{1,i})(1 + i\omega\tau_{2,i})}{1 + i\omega\tau_{3,i}} . \quad (4)$$

The dynamical response may be quantified through the susceptibility

$$\widehat{\chi}_{ij}(\omega) = \frac{\partial \widehat{x}_i}{\partial \widehat{b}_j^o} . \quad (5)$$

We note that

$$\widehat{\chi}_{ij}(\omega) = \frac{\partial \widehat{x}_i}{\partial \widehat{y}} \frac{\partial \widehat{y}}{\partial \widehat{b}_j^o} \equiv g_{i\mu}(\omega) g_{\mu j}(\omega) , \quad (6)$$

where we have introduced the frequency-dependent gains

$$g_{i\mu}(\omega) \equiv \frac{\partial \widehat{x}_i}{\partial \widehat{y}} = -\frac{[m_i]}{[\mu]} \left( 1 + \frac{\mu_{0,i}}{[\mu]} Z_i(\omega) \right)^{-1} \quad (7)$$

$$g_{\mu j}(\omega) \equiv \frac{\partial \widehat{y}}{\partial \widehat{b}_j^o} = -\chi_{\mu\mu}(\omega) V_j(\omega) \quad (8)$$

with  $\chi_{\mu\mu}(\omega) = \Delta(\omega)^{-1}$  and

$$V_j(\omega) = \begin{cases} \frac{\sigma_j}{\sigma_j + \kappa_j} \frac{1 + i\omega\tau_{4,j}}{1 + i\omega\tau_{3,j}} \left( 1 + \frac{\mu_{0,j}}{[\mu]} Z_j(\omega) \right)^{-1} & \text{if } \sigma_j > 0 \\ \frac{i\omega\tau_{5,j}}{1 + i\omega\tau_{5,j}} \left( 1 + \frac{\mu_{0,j}}{[\mu]} Z_j(\omega) \right)^{-1} & \text{if } \sigma_j = 0 . \end{cases} \quad (9)$$

Upon defining the filters  $J_i(\omega)$ ,  $C_i(\omega)$ ,  $S_i(\omega)$  and  $D(\omega)$  as in the Main Text, one may re-cast the above gains as

$$g_{i\mu}(\omega) = J_i(\omega) g_{i\mu}(0) \quad (10)$$

and

$$g_{\mu j}(\omega) = \begin{cases} -D(\omega) J_j(\omega) S_j(\omega) g_{\mu j}(0) & \text{if } \sigma_j > 0 \\ -D(\omega) J_j(\omega) C_j(\omega) \widetilde{g}_{\mu j}(0) & \text{if } \sigma_j = 0 , \end{cases} \quad (11)$$

where  $\widetilde{g}_{\mu j}(0)$  is the steady state term for the completely stoichiometric case (obtained upon setting  $\kappa_i \rightarrow 0$  and  $\sigma_i \rightarrow \kappa_i$ )

Putting pieces together, we find

$$\widehat{\chi}_{ij}(\omega) = \begin{cases} D(\omega) [S_j(\omega) J_i(\omega) J_j(\omega)] \chi_{ij}^{ss} & \text{if } \sigma_j \neq 0 \\ D(\omega) [C_j(\omega) J_i(\omega) J_j(\omega)] \widetilde{\chi}_{ij}^{ss} & \text{if } \sigma_j = 0 \end{cases} \quad (12)$$

where

$$\chi_{ij}^{ss} \equiv \widehat{\chi}_{ij}(0) = g_{i\mu}(0) g_{\mu i}(0) \quad (13)$$

and

$$\widetilde{\chi}_{ij}^{ss} \equiv \lim_{\sigma_j \rightarrow 0} \frac{\sigma_j + \kappa_j}{\sigma_j} \chi_{ij}^{ss} , \quad (14)$$

which corresponds to the steady state susceptibility of a system without recycling (i.e. with  $\kappa_i \rightarrow 0$  and  $\sigma_i \rightarrow \kappa_i$ ). Finally, the self response is given by

$$\widehat{\chi}_{ii}(\omega) \equiv \frac{\partial \widehat{x}_i}{\partial \widehat{b}_i^o} = \frac{J_i(\omega) \chi_{ii}(0)}{1 + i\omega\tau_{1,i}} \quad (15)$$

## Susceptibilities

Figure S1 through S4 show the dynamical susceptibility  $\chi_{ij}(\omega)$  for pairs of ‘free’, ‘susceptible’ and ‘bound’ ceRNAs in the different limits considered in the main text.

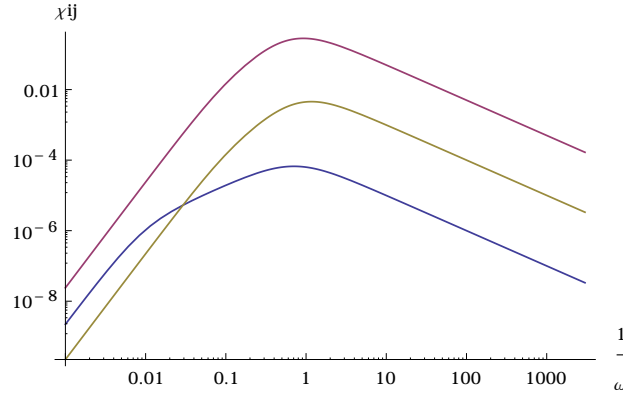

Figure S1: **Slow dissociation, fast processing** Dynamical susceptibility  $\chi_{ij}(\omega)$  for slow complex dissociation in a fully catalytic system ( $\sigma_i = 0, \kappa_i = 10$ ) for pairs of ‘free’ ( $\rho_i = 100$ , in yellow), ‘susceptible’ ( $\rho_i = 1$ , in red) and ‘bound’ ( $\rho_i = 0.01$ , in blue) ceRNAs. Remaining parameters are set as follows:  $d_i = 1, k_i^- = 0, \delta = 1, b_i = 1$  for each  $i$ .

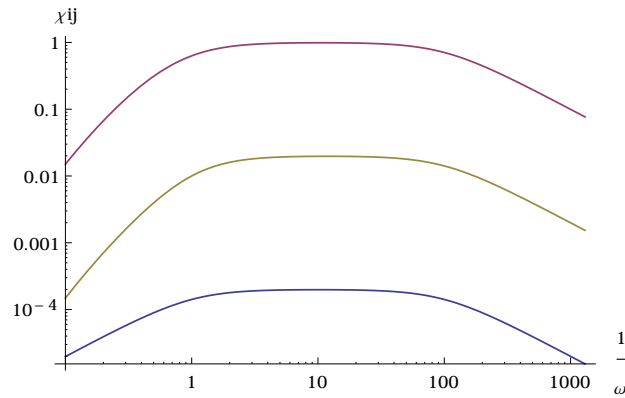

Figure S2: **Slow dissociation, slow processing** Dynamical susceptibility  $\chi_{ij}(\omega)$  in a fully catalytic system ( $\sigma_i = 0, \kappa_i = 0.01$ ) for a couple of free ceRNA ( $\rho_i = 100$ , in yellow), for a couple of susc ceRNA ( $\rho_i = 1$ , in red), for a couple of bound ceRNA ( $\rho_i = 0.01$ , in blue). Other parameters are set as follows:  $d_i = 1, k_i^- = 0, \delta = 1, b_i = 1$  for each  $i$ .

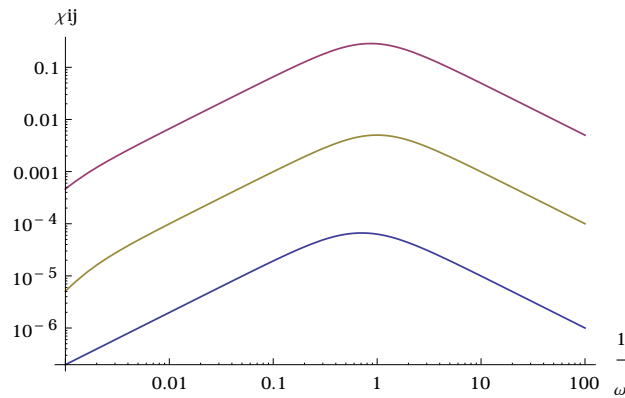

Figure S3: **Fast dissociation, fast processing** Dynamical susceptibility  $\chi_{ij}(\omega)$  for fast complex dissociation in a fully catalytic system ( $\sigma_i = 0, \kappa_i = 10$ ) for pairs of ‘free’ ( $\rho_i = 100$ , in yellow), ‘susceptible’ ( $\rho_i = 1$ , in red) and ‘bound’ ceRNAs ( $\rho_i = 0.01$ , in blue). Other parameters are set as follows:  $d_i = 1, k_i^- = 1000, \delta = 1, b_i = 1$  for each  $i$ .

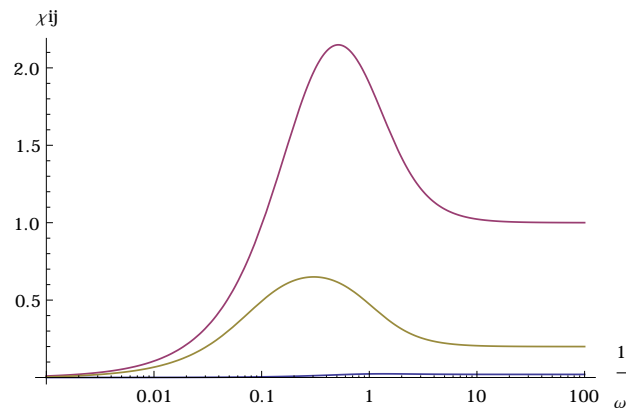

Figure S4: **Fast dissociation, slow processing** Dynamical susceptibility  $\chi_{ij}(\omega)$  for fast complex dissociation in a fully stoichiometric system ( $\sigma_i = 0.5, \kappa_i = 0$ ) for pairs of ‘free’ ( $\rho_i = 100$ , in yellow), ‘susceptible’ ( $\rho_i = 1$ , in red) and ‘bound’ ( $\rho_i = 0.01$ , in blue) ceRNAs. Other parameters are set as follows:  $d_i = 1, k_i^- = 1000, \delta = 1, b_i = 1$  for each  $i$ .

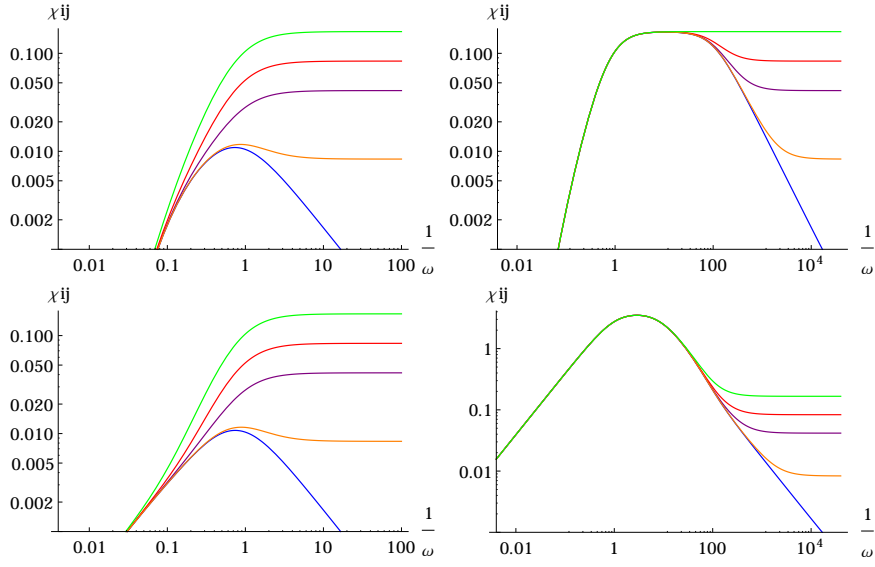

**Figure S5: Dynamical susceptibilities in case of mixed stoichiometric and catalytic complex processing** Dynamical susceptibility  $\chi_{ij}(\omega)$  for pairs of ‘susceptible’ ( $\rho_i = 1$ ) ceRNAs, for completely catalytic ( $\sigma_i = 0$ , blue line), prevalently catalytic ( $\kappa_i = 20\sigma_i$ , orange line), half stoichiometric/half catalytic ( $\sigma_i = \kappa_i$ , purple line), prevalently stoichiometric ( $\sigma_i = 3\kappa_i$ , red line) and completely stoichiometric ( $\kappa_i = 0$ , green line) systems, with fast processing and slow dissociation ( $\sigma_i + \kappa_i = 10$ ,  $k_i^- = 0$ , top left), slow processing and slow dissociation ( $\sigma_i + \kappa_i = 0.1$ ,  $k_i^- = 0$ , top right), fast processing and fast dissociation ( $\sigma_i + \kappa_i = 10$ ,  $k_i^- = 1000$ , bottom left), and slow processing and fast dissociation ( $\sigma_i + \kappa_i = 10$ ,  $k_i^- = 1000$ , bottom right). Remaining parameters have been fixed as follows:  $d_i = 1, \delta = 1, b_i = 1$  for each  $i$ .

## Estimate of the relaxation time following a large, saturating perturbation

In the case of a kinetically homogeneous system, where binding is irreversible and remaining kinetic parameters are the same for all ceRNAs, in particular  $d_i = d$ ,  $k_i^+ = k^+$ ,  $k_i^- = k^- = 0$ ,  $\kappa_i = \kappa$  (and hence  $\mu_{0,i} = \mu_0 = \frac{d}{k^+}$ ) for all  $i$ , and assuming that ceRNAs and miRNAs reach a fast equilibrium with respect to the instantaneous values of the levels of the complexes, the following relations hold:

$$m_i(t) \simeq \frac{b_i}{d + k^+ \mu(t)} \quad i = 1, \dots, N \quad (16)$$

$$\mu(t) \simeq \frac{\beta + \kappa \sum_j c_j(t)}{\delta + k^+ \sum_j m_j(t)} \quad (17)$$

$$\frac{dc_i(t)}{dt} = k^+ \mu(t) m_i(t) - \kappa c_i(t) \quad i = 1, \dots, N \quad (18)$$

If the perturbation is large enough, miRNAs are instantaneously sequestered by the complexes and never undergo spontaneous decay, so that  $k^+ \sum_j m_j \gg \delta$ . In this case one finds that the overall concentration of the complexes grows at constant rate  $\beta$ :

$$\sum_i \dot{c}_i = \beta \quad (19)$$

It follows that

$$\mu(t) \simeq \frac{\beta + \kappa (\sum_j c_j(0) + \beta t)}{\sum_j k^+ m_j(t)} \simeq \frac{\kappa \beta t}{k^+ \sum_j m_j(t)} \quad (20)$$

for large enough  $t$ .

The relaxation time  $\tau_{rel}$  can be estimated by the condition

$$\mu(\tau_{rel}) \simeq \mu_0 = \frac{\delta}{k^+}, \quad (21)$$

or, accordingly,

$$m_i(\tau_{rel}) \simeq \frac{m_i^*}{2}. \quad (22)$$

Plugging (21) and (22) into (20) one gets, in the limit of large perturbations  $\Delta_i$ ,

$$\tau_{rel} \simeq \frac{\mu_0 k^+ \sum_j m_j}{\beta \kappa} \simeq \frac{\Delta_j b_j}{2\beta \kappa} \quad (23)$$

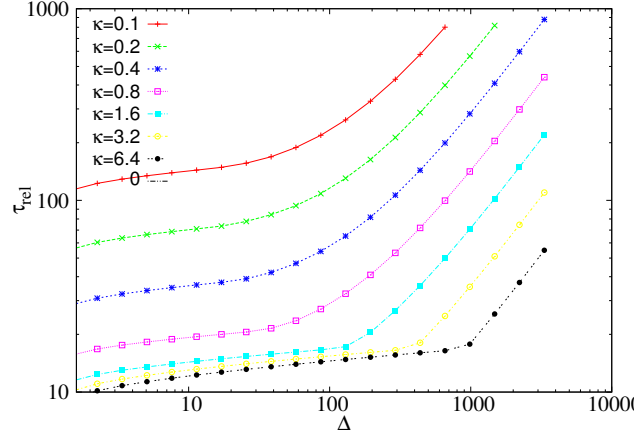

Figure S6: Relaxation time  $\tau_{rel}$ , as a function of the size of the perturbation, for different values of the rate of catalytic complex processing  $\kappa$ . Remaining kinetic parameters are as follows:  $b_1 = \beta = 1$ ,  $b_2 = 1$ ,  $d_1 = d_2 = \delta = 1$ ,  $k_1^+ = k_2^+ = 100$ ,  $k_1^- = k_2^- = 0$ .

where we have used

$$\sum_i m_i(\tau_{rel}) = \sum_i \frac{m_i^*}{2} = \frac{(\sum_i b_i) + b_j \Delta_j}{2\delta} \simeq \frac{\Delta_j b_j}{2\delta} \quad (24)$$



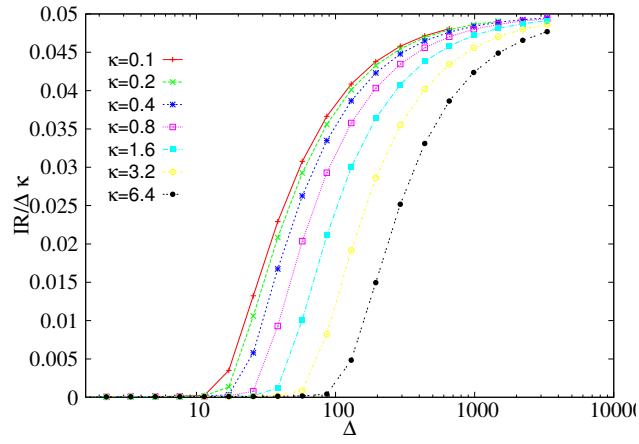

Figure S7: Integrated response IR between bound ceRNAs as a function of the perturbation size  $\Delta$ , for different processing rates  $\kappa$ . Remaining kinetic parameters are as follows:  $b_1 = b_2 = 1$ ,  $\beta = 1$ ,  $d_1 = d_2 = \delta = 1$ ,  $k_1^- = k_2^- = 0$ ,  $\kappa_1 = 1$ ,  $k_2^+ = 100$
